# Supplementary material
Source: Springer Nature journal article supplement (https://www.springermedizin.de/resource/supplementary/12916_2012_614_MOESM1_ESM.pdf/9597888)
Supplement: MOESM1 [file 9597888]

Clear case definitions of epileptic seizures and epilepsy, tailored for use by non-physician healthcare workers

User-friendly guidelines adapted for local environment, based on local diagnostic capacity and with input from local experts and stakeholders

Active dissemination of guidelines with workshops appropriate for resource-low setting

Implementation of the guidelines within the framework of the existing healthcare delivery system. Should include using the guidelines for testing for treatable causes of epilepsy

Meticulous evaluation of guidelines which include local researchers and provides feedback to the local stakeholders as well as the WHO
